# Supplementary material for: Targeted disruption of the mouse Csrp2 gene encoding the cysteine- and glycine-rich LIM domain protein CRP2 result in subtle alteration of cardiac ultrastructure
Source: PubMed Central journal article supplement (PMC2529283; doi:10.1186/1471-213x-8-80), 2008-08-19

**A**

relative expression [%]

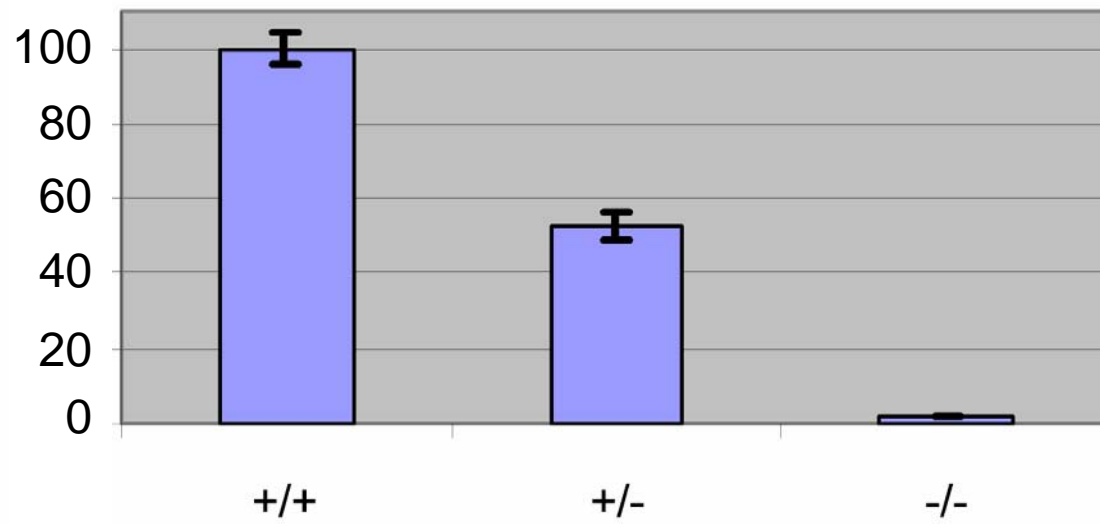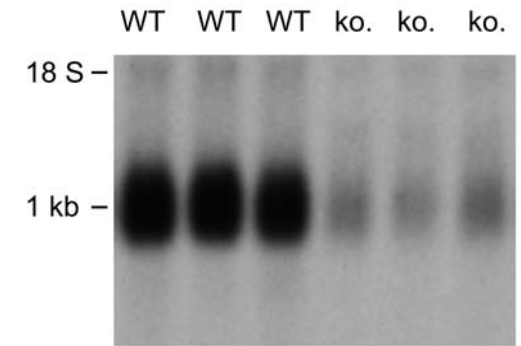**B**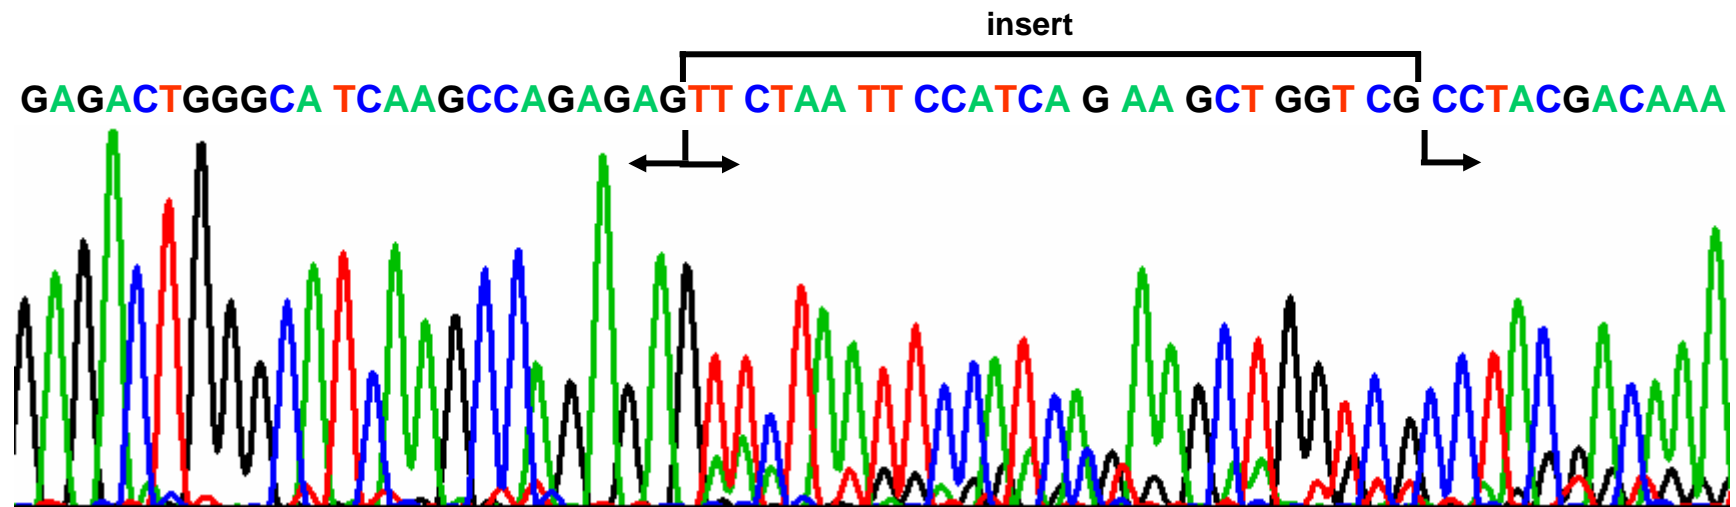

Supplement: 1471-213X-8-80-S1.pdf [file 1471-213X-8-80-S1.pdf]
